# Supplementary material for: RNA Pol II pausing facilitates phased pluripotency transitions by buffering transcription
Source: PubMed Central journal article supplement — Genes Dev. 2022 Jul 1;36(13-14):770–89. doi: 10.1101/gad.349565.122 (PMC9480856; doi:10.1101/gad.349565.122), 2022-07-01
Supplement: supp_gad.349565.122_Supplemental_Fig_S1.pdf [file supp_gad.349565.122_Supplemental_Fig_S1.pdf]

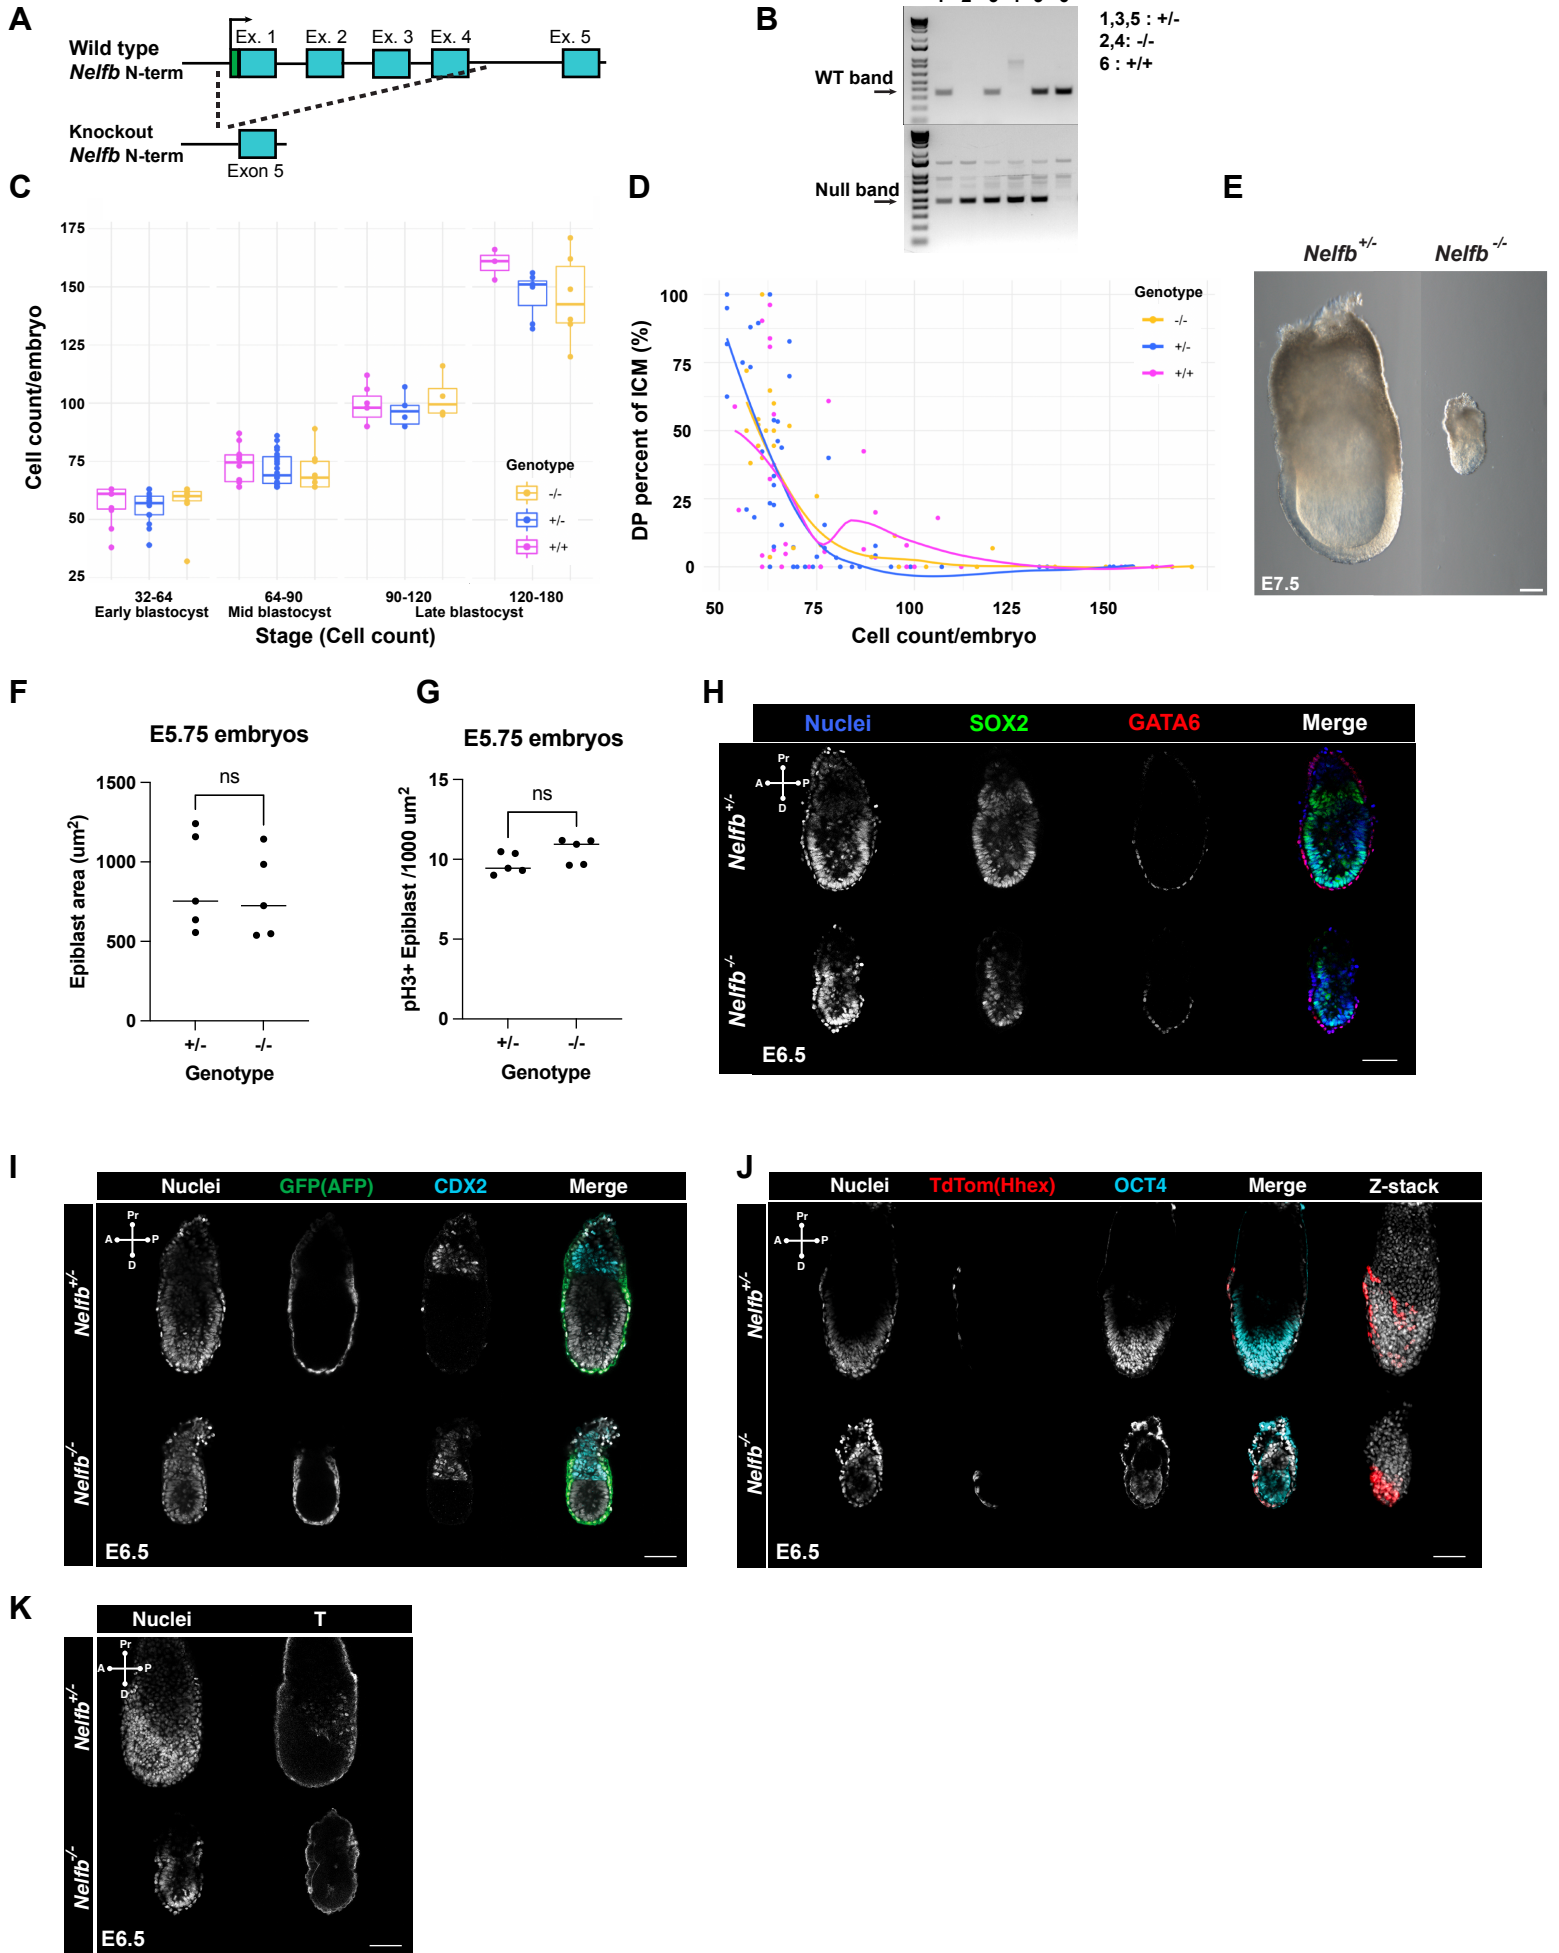

**Fig S1. *Nelfb*<sup>-/-</sup> embryos display defects in pluripotent epiblast state transitions, related to**

**Figure 1.**

- (A) Schematic of the *Nelfb* knockout (*Nelfb*<sup>-</sup>) allele.
- (B) Example of embryo genotyping at the *Nelfb* locus.
- (C) Total cell count per blastocyst per genotype per stage.
- (D) Percentage of double positive nuclei: NANOG<sup>+</sup> GATA6<sup>+</sup> of the ICM in each blastocyst per genotype. Each dot represents an embryo. Loess line fit is shown.
- (E) Brightfield images of heterozygous and null embryos at E7.5. Scale bar 100μm
- (F) Epiblast layer area in E5.75 embryos.
- (G) Ratio (count/area) of dividing nuclei in the epiblast cup region. Dividing nuclei were visualized via immunostaining for phosphorylated H3 (pH3). Statistical testing was performed using a t-test.
- (H – K) Immunofluorescence of E6.5 embryos. Nuclei are labeled with Hoechst. Single Z slices are shown. Scale bar 100μm.
