# Supplementary material for: RNA Pol II pausing facilitates phased pluripotency transitions by buffering transcription
Source: PubMed Central journal article supplement — Genes Dev. 2022 Jul 1;36(13-14):770–89. doi: 10.1101/gad.349565.122 (PMC9480856; doi:10.1101/gad.349565.122), 2022-07-01
Supplement: supp_gad.349565.122_Supplemental_Fig_S2.pdf [file supp_gad.349565.122_Supplemental_Fig_S2.pdf]

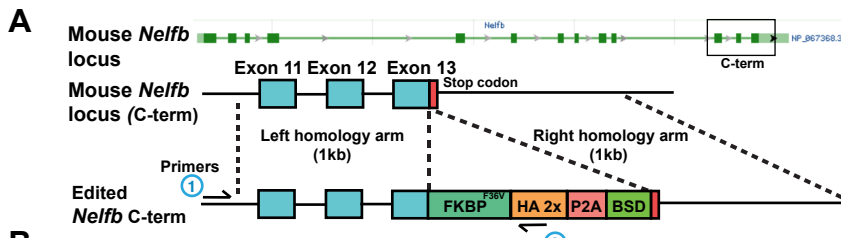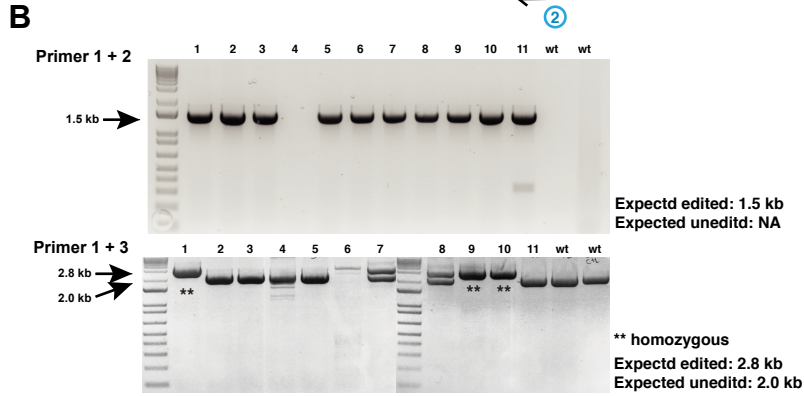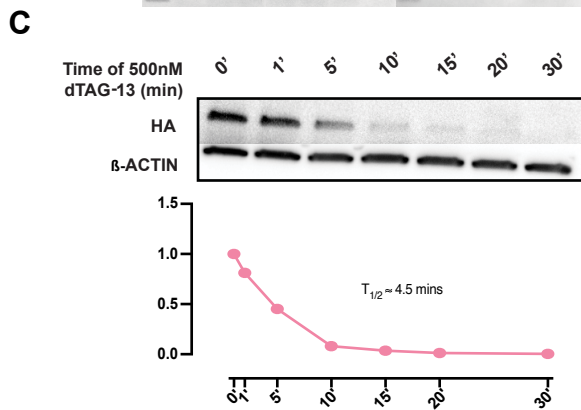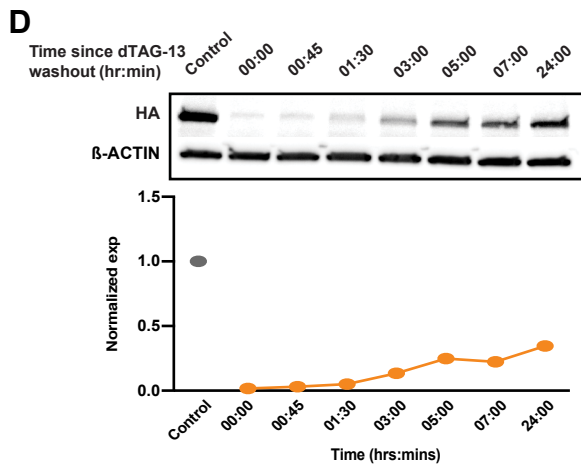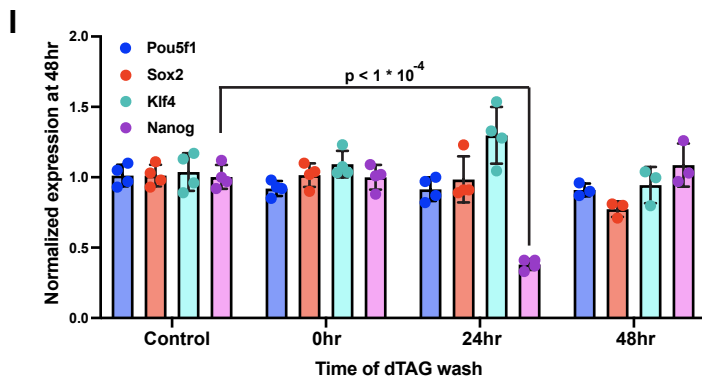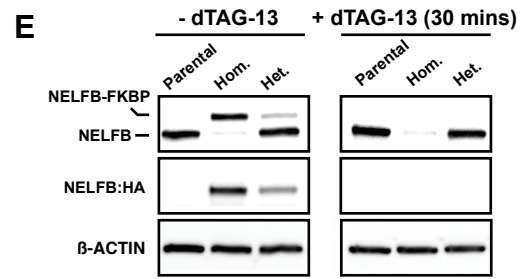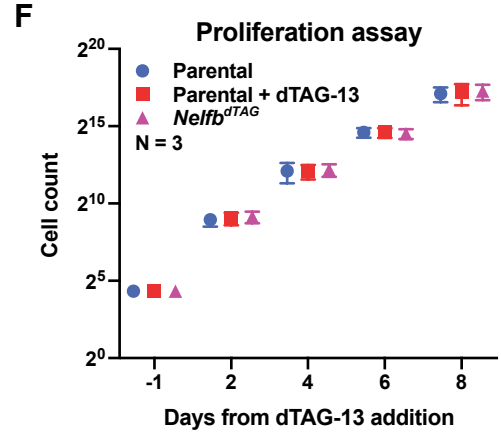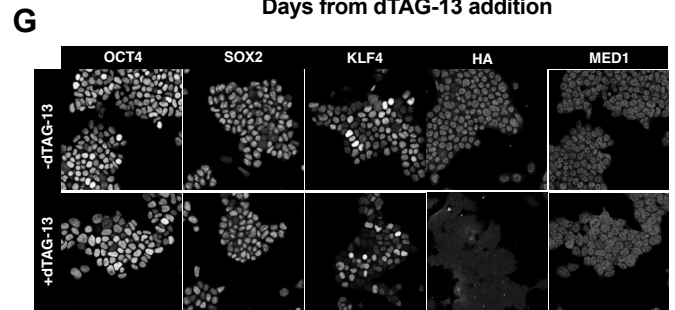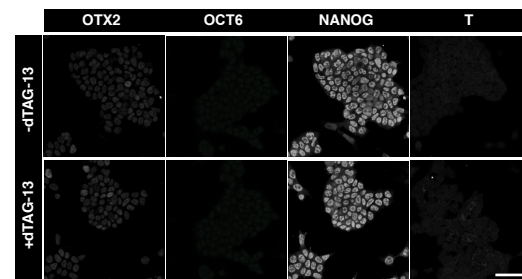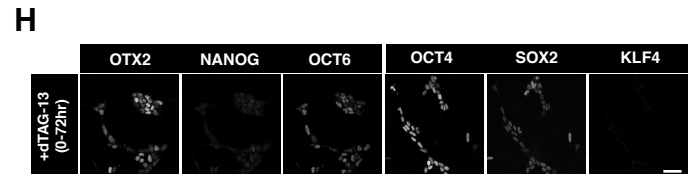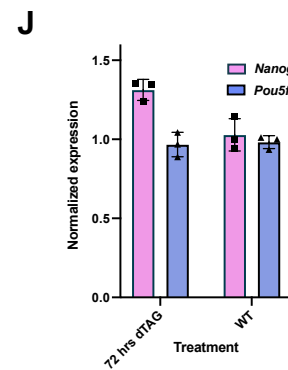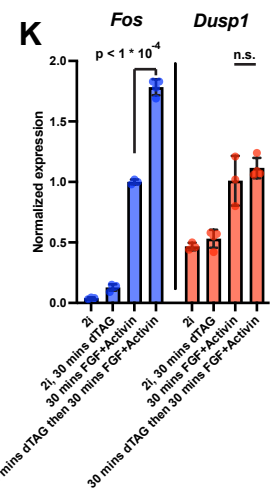

**Fig S2. NELFB-depleted mESCs recapitulate defects in pluripotent state transitions observed in the embryo, related to Figure 2.**

- (A) Top: NCBI genome browser shot of mouse *Nelfb* locus. Bottom: Schematic of *Nelfb*<sup>deg</sup> knock-in strategy.
- (B) Genotyping of targeted clones to identify correctly targeted homozygous clones.
- (C) Western blot and quantification of NELFB degradation dynamics with 5 mins intervals.
- (D) Western blot and quantification of NELFB recovery dynamics following 1 hour dTAG-13 treatment and wash.
- (E) Western blot using NELFB antibody to validate correctly generated homozygous clones.
- (F) Proliferation assay of parental cells and *Nelfb*<sup>deg</sup> mESC in the presence and absence of dTAG-13. Cells were counted and passaged every two days. Control conditions Related to Figure 2D.
- (G) Immunofluorescence of *Nelfb*<sup>deg</sup> mESC at 0hr of transitions representing naïve state with and without 24 hours of dTAG-13. Scale bar 50µm.
- (H) Immunofluorescence of *Nelfb*<sup>deg</sup> mESC following pluripotency transitions at 72 hours with dTAG-13 from 0-72 hours. Related to Figure 2F. Scale bar 50µm.
- (I) Normalized RT-qPCR expression of select genes with transient dTAG-13 treatment, 1 hour followed by wash. Data points show only hour 48 analysis for statistical validation. Related to Figure 2H. Statistical testing was performed using a t-test.
- (J) Normalized RT-qPCR expression of select genes with dTAG-13 treatment in naïve *Nelfb*<sup>deg</sup> mESC (0hr state) for 72 hours. Statistical testing was performed using a t-test.

(K) Normalized RT-qPCR expression of select genes with 30 mins dTAG-13 treatment in naïve *Nelfb<sup>deg</sup>* mESC (0hr state) followed by acute 30 mins FGF + ACTIVIN treatment.

Statistical testing was performed using a t-test.

All RT-qPCR data is normalized to *Actb*, then control.
