# Supplementary material for: RNA Pol II pausing facilitates phased pluripotency transitions by buffering transcription
Source: PubMed Central journal article supplement — Genes Dev. 2022 Jul 1;36(13-14):770–89. doi: 10.1101/gad.349565.122 (PMC9480856; doi:10.1101/gad.349565.122), 2022-07-01
Supplement: supp_gad.349565.122_Supplemental_Fig_S3.pdf [file supp_gad.349565.122_Supplemental_Fig_S3.pdf]

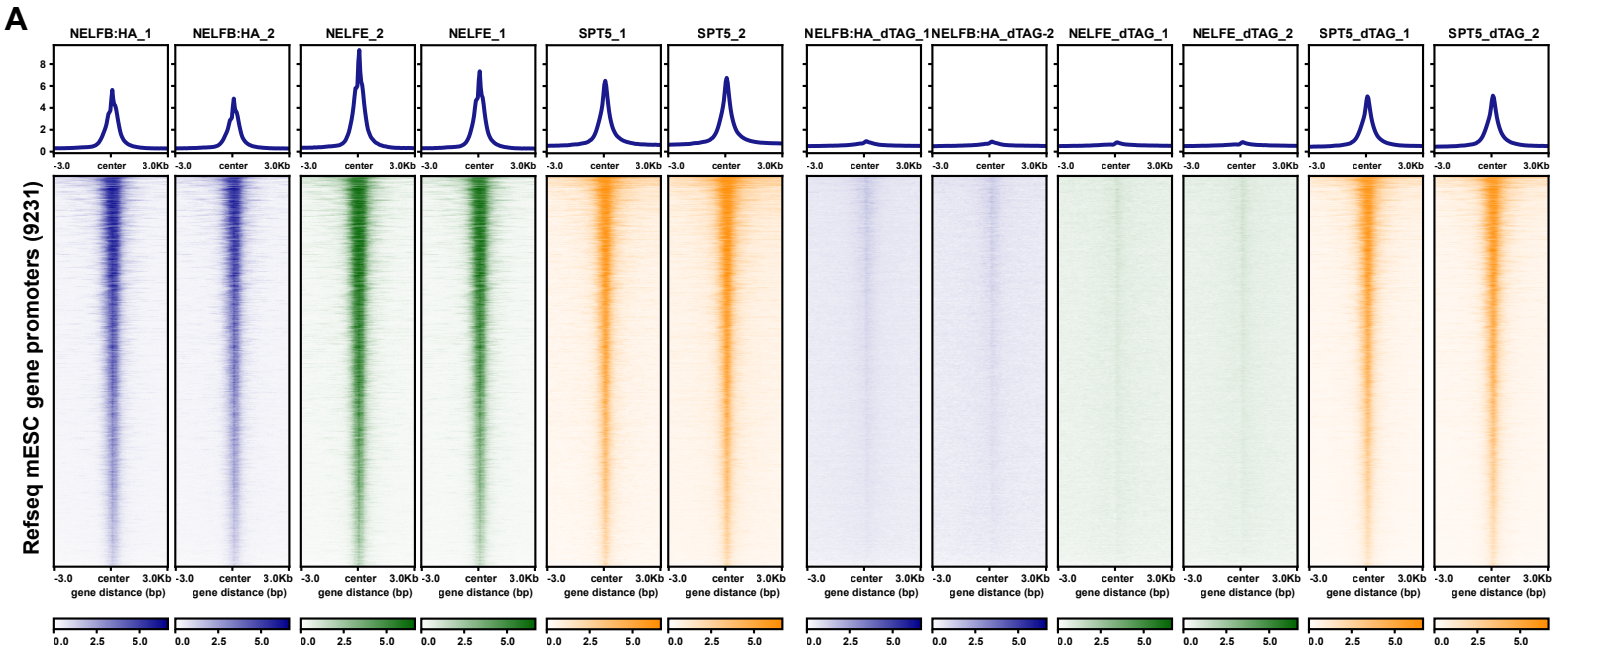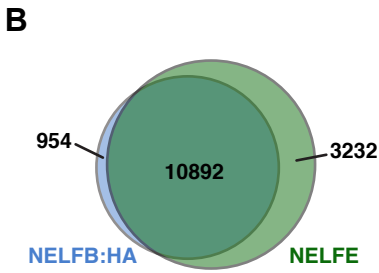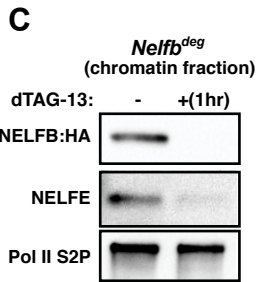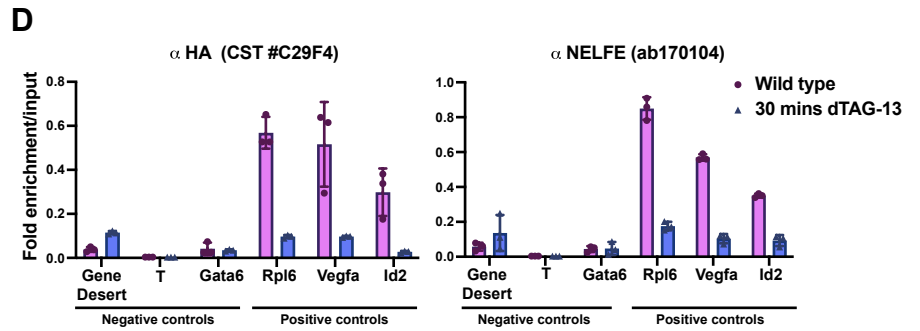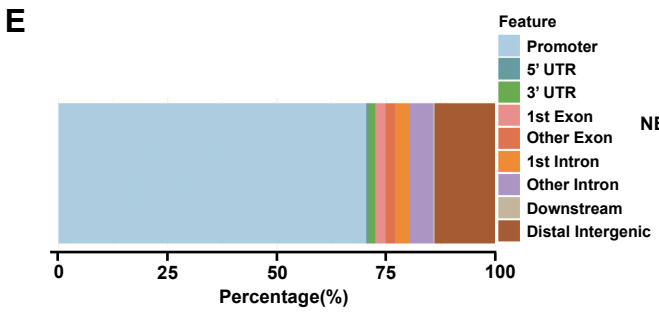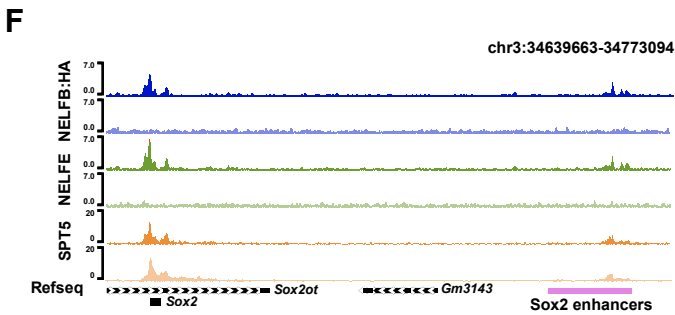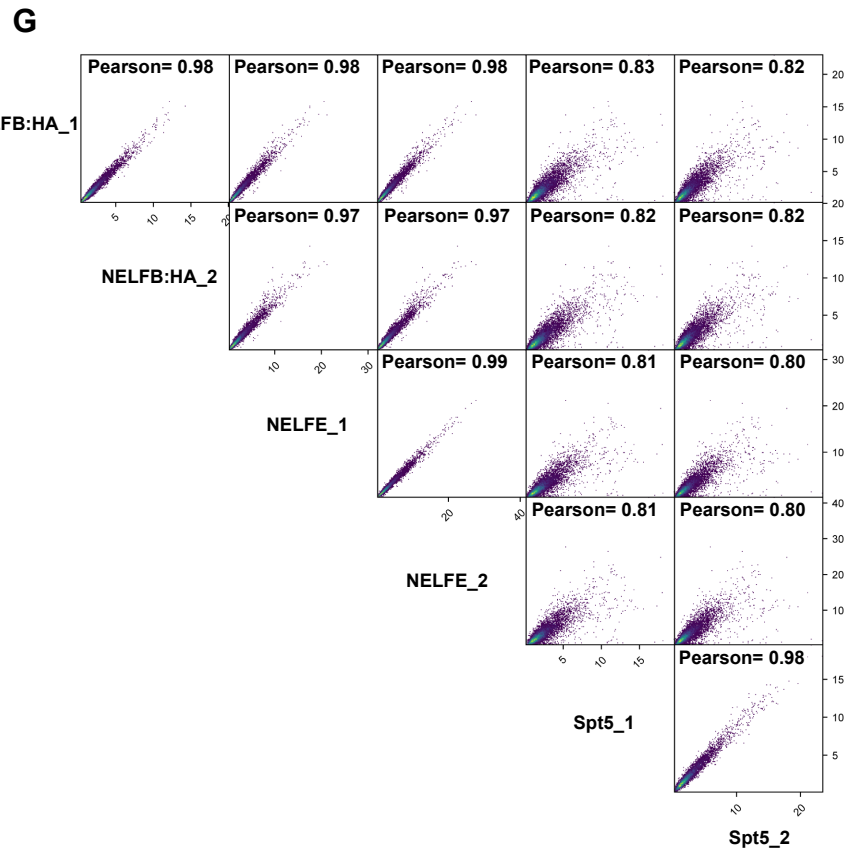

**Fig S3. NELF displays widespread binding at promoters and enhancers and *Nelfb*<sup>deg</sup> enables acute clearance of the NELF complex from chromatin.**

- (A) Heatmaps of NELFB, NELFE, and SPT5 signal across replicates and conditions presented in Figure 3A.
- (B) Venn diagram of overlap between NELFB and NELFE peaks. Peaks have a q. value < 0.05 cutoff.
- (C) Western blot of chromatin fraction *Nelfb*<sup>deg</sup> mESC with and without 1 hour of dTAG-13 treatment.
- (D) ChIP-qPCR validation of ChIP experiments NELFB and NELFE following 30 mins of dTAG-13 treatment.
- (E) NELF peaks annotation.
- (F) Genome browser shot of a representative enhancer region showing NELF peaks. Related to Figure 3F.
- (G) Signal Pearson correlation across ChIP-seq replicates and samples.
