# Supplementary material for: RNA Pol II pausing facilitates phased pluripotency transitions by buffering transcription
Source: PubMed Central journal article supplement — Genes Dev. 2022 Jul 1;36(13-14):770–89. doi: 10.1101/gad.349565.122 (PMC9480856; doi:10.1101/gad.349565.122), 2022-07-01
Supplement: supp_gad.349565.122_Supplemental_Fig_S5.pdf [file supp_gad.349565.122_Supplemental_Fig_S5.pdf]

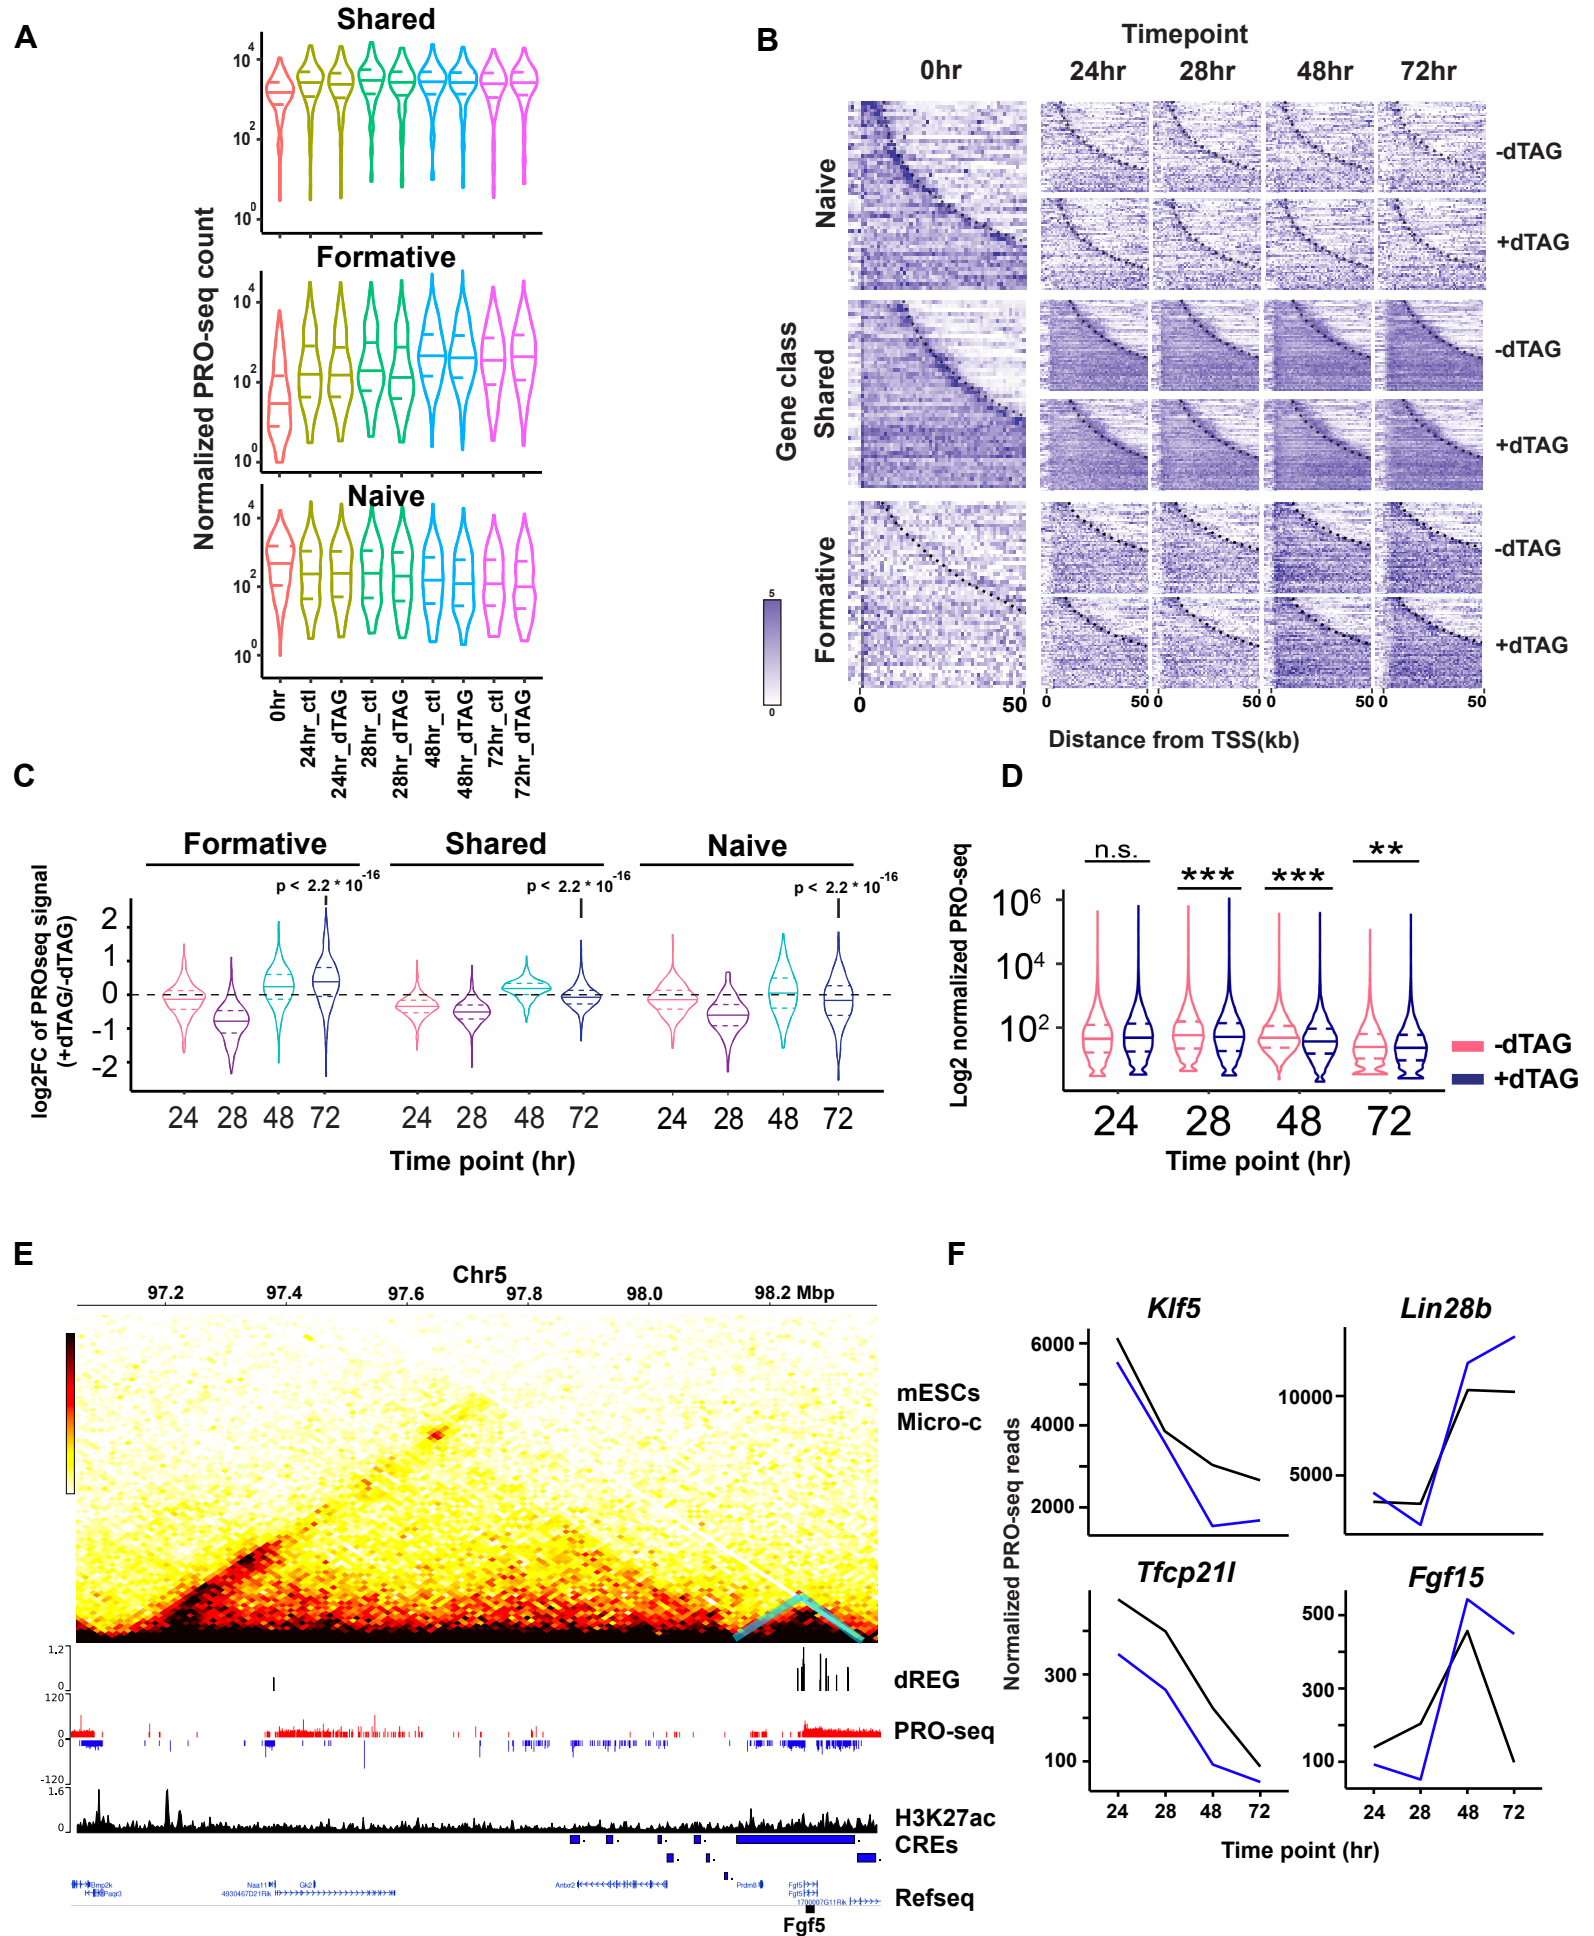

**Fig S5. NELF balances gene induction and repression during pluripotency transitions, related to Figure 5**

- (A) Violin plot of normalized PRO-seq count/gene in each gene class per treatment per time point in our analysis, related to Figure 5C.
- (B) Heatmap of PRO-seq signal in each gene class at each time point with and without dTAG-13. Dashed lines represent poly A sites, related to Figure 5C and S5A.
- (C) Violin plot of log<sub>2</sub> fold change of PRO-seq data gene expression at each time point of the analysis per gene group, related to Figure 5E. Statistical testing was performed using Wilcoxon test to compare +/- dTAG-13 at 72 hr.
- (D) Violin plot of PRO-seq signal at TREs identified by dREG at each time point with and without dTAG-13.
- (E) Example of defining putative enhancers for certain loci using public Micro-c data, dREG, and H3K27ac marks. *Fgf5* locus is shown. Related to Figure 5F.
- (F) PRO-seq signal of additional naïve genes (*Klf5* and *Tfcp2l1*) and formative genes (*Lin28b* and *Fgf15*) during transitions, with and without dTAG-13 treatments, related to Figure 5F.
