# Supplementary material for: RNA Pol II pausing facilitates phased pluripotency transitions by buffering transcription
Source: PubMed Central journal article supplement — Genes Dev. 2022 Jul 1;36(13-14):770–89. doi: 10.1101/gad.349565.122 (PMC9480856; doi:10.1101/gad.349565.122), 2022-07-01
Supplement: supp_gad.349565.122_Supplemental_Fig_S7.pdf [file supp_gad.349565.122_Supplemental_Fig_S7.pdf]

A

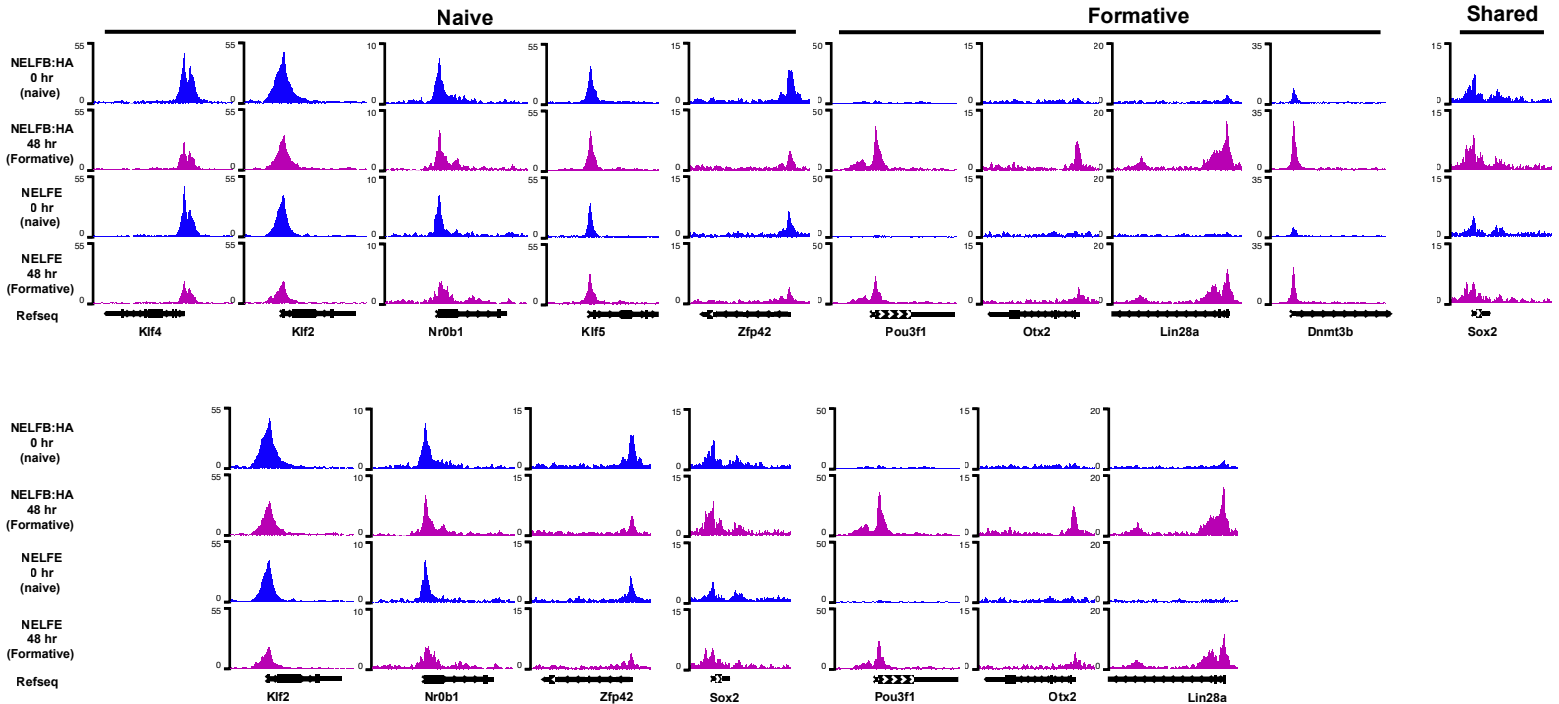

**Fig S7. Genome Browser shots of NELFB and NELFE ChIP-seq in naive and formative states.**

(A) Additional genome browser shots related to Figure 6G.
